# Supplementary material
Source: PubMed Central journal article supplement (PMC4378159)
Supplement: supp_pp.114.253799_253799supp.pdf [file supp_pp.114.253799_253799supp.pdf]

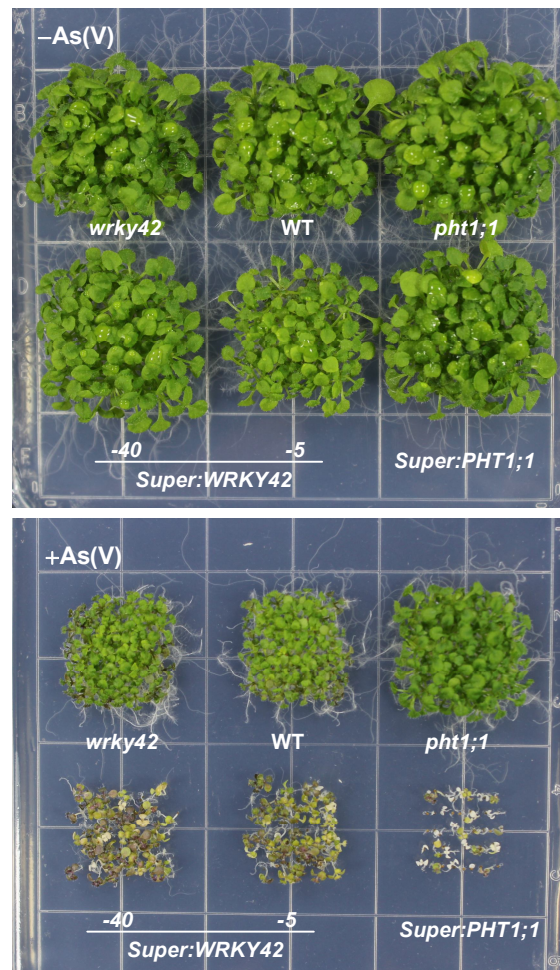

**Supplemental Figure 1.** Arsenate Tolerance Phenotype Test.

Plants were germinated and grown on 1/2 MS medium with [+As(V)] or without [-As(V)] 200  $\mu$ M arsenate for 20 d.

**Supplemental Table 1.** Primer sequences used in this study.

| Primer Name                                        | Forward Primer (5' → 3')                                                                | Reverse Primer (5' → 3')        |
|----------------------------------------------------|-----------------------------------------------------------------------------------------|---------------------------------|
| Primers for transgenic construction                |                                                                                         |                                 |
| <i>Super:WRKY42</i>                                | CCCGGGATGTTTCGTTTTCCGGTAAGTC                                                            | CCGAGCTCTTATTGCCTATTGTCAACGTTGC |
| <i>WRKY42-GFP</i>                                  | ACTAGTATGTTTCGTTTTCCGGTAAGTC                                                            | GGTACCTTGCCTATTGTCAACGTTGC      |
| <i>ProWRKY42:GUS</i>                               | GAATTCATAGTGGATAGTCCACATTGTTGACAC                                                       | CTGCAGACTTACCGGAAAACGAAACATCTC  |
| Primers for RT-PCR                                 |                                                                                         |                                 |
| <i>EF1<math>\alpha</math></i>                      | ATGCCCCAGGACATCGTGATTTTCAT                                                              | TTGGCGGCACCCTTACGTGGATCA        |
| <i>WRKY42</i>                                      | TGGAAGAGAAAACGTACAAAGTGT                                                                | GGCCGCTTGCTCAATGACCT            |
| <i>WRKY6</i>                                       | CGTTGCTGGAGATAATGACCG                                                                   | TCTTCCCGTTACTACGCCTCT           |
| Primers for qRT-PCR                                |                                                                                         |                                 |
| <i>ACT2/8</i>                                      | ACGGTAACATTGTGCTCAGTGGTG                                                                | CTTGGAGATCCACATCTGCTGGA         |
| <i>WRKY42</i>                                      | CCGCTAAACGCTGGTGAGA                                                                     | CGGCAAAGTTGGGATTGG              |
| <i>WRKY6</i>                                       | CCGCCTCCTAATGGTTCCA                                                                     | TGCATCAGTGAGTTGTGGTTGTT         |
| <i>PHO1</i>                                        | TGGTTCTCCGGAACAAGAAC                                                                    | TGACTTCAAGTGACGCCAAG            |
| <i>PHT1;1</i>                                      | CCTTTGGGTTCTATATGCG                                                                     | TAACTCAGCCTCACCAGAG             |
| Primers for ChIP                                   |                                                                                         |                                 |
| <i>ProPHO1</i> Q Site                              | GCCAATCCCGACTAAATTCC                                                                    | ACGTTTCAACGGTACTATCTTTCTG       |
| <i>ProPHO1</i> X Site                              | CTAAAACAAAATGTTGCATCAATTA                                                               | TGTATCAATTTCAATGAACTAATGATGTC   |
| <i>ProPHO1</i> Y Site                              | ACAGTTTGCTTTCAAATCAGTTATTG                                                              | AAACATCTTCACTTTTCCATCAAA        |
| <i>ProPHO1</i> Z Site                              | ATGGTCTCGAACTTGACAAAAAT                                                                 | GCTTTATATATACCATGATCCGTGATG     |
| <i>ProPHT1;1</i> P1                                | GTCAAATGCTCTGTTCCA                                                                      | CATACAACGCAAAGAATCC             |
| <i>ProPHT1;1</i> P2                                | TAAACATACGGAGGGAGT                                                                      | GGAGAGTTGAGGAGAGACT             |
| <i>ProPHT1;1</i> P3                                | TGTAATGGCAACTAAGTCC                                                                     | TTTGAGGAGTGACAATCAG             |
| <i>ProPHT1;1</i> P4                                | ATGTTTCGTAATGGTGGAT                                                                     | CTGTGTAGTAGAGATAAGCA            |
| Primers for EMSA                                   |                                                                                         |                                 |
| <i>ProPHT1;1</i> P2                                | TAAACATCAACTATAAA                                                                       | ATTAAGAACTTCTCTGGA              |
| Primers for mutation probe in EMSA                 |                                                                                         |                                 |
| <i>ProPHT1;1</i> mP2                               | CATACGGAGGGAGTATTGAACGTTAAAATTCTAAAATCC<br>AATTGTTCAATTTCTAAACGTCACATATAGTCTCTCCTCAACTC |                                 |
| Primers for protein expression in <i>E. coli</i> . |                                                                                         |                                 |
| <i>WRKY42</i>                                      | GATATCATGTTTCGTTTTCCGGTAAGTC                                                            | GTCGACTTATTGCCTATTGTCAACGTTGC   |
